# Supplementary material for: Examining the key features of specialist health service provision for women with Female Genital Mutilation/Cutting (FGM/C) in the Global North: a scoping review
Source: Front Glob Womens Health. 2024 May 22;5:1329819. doi: 10.3389/fgwh.2024.1329819 (PMC11150566; doi:10.3389/fgwh.2024.1329819)
Supplement: Supplementary file 4 [file Table3.xlsx]

## Sheet: Sheet1
	Included articles		Reason for exclusion	Title	1st Author	Year of publication	Country in which study conducted	Type of article
		1	Conference abstract	Female Genital Mutilation/Cutting: sharing data and experiences to accelerate eradication and improve care: part 2 Geneva, Switzerland. March 13-14, 2017	Johnson-Agbakwu	2017	USA	Conference abstracts
	1	2		Obstetric care of women with female genital mutilation attending a specialized clinic in a tertiary center.	Abdulcadir	2016	Switzerland	journal article
	2	3		Clitoral neuroma after female genital mutilation/cutting: a rare but possible event.	Abdulcadir	2012	Switzerland	journal article
		4	Comment	Rethinking Reconstruction: Ethical Standards and Practice Guidelines as a Prerequisite to Clitoral Reconstruction Following Female Genital Mutilation/Cutting	Abdulcadir	2022	Switzerland	editorial letter
	3	5		Clitoral Reconstruction after Female Genital Mutilation/Cutting: Case Studies	Abdulcadir	2015	Switzerland	journal article
	4	6		Management of painful clitoral neuroma after female genital mutilation/cutting	Abdulcadir	2017	Switzerland	journal article
		7	Hcp's views of general materntiy care	Defibulated immigrant women's sexual and reproductive health from the perspective of midwives and gynaecologists as primary care providers in Sweden-A phenomenographic study	Ahmed	2021	Sweden	journal article
		8	Not found	The demographics of patients with female genital mutilation attending a specialist antenatal clinic in the United Kingdom	Ajibona O	2015	UK
	5	9		Healthcare for Women and Girls Who Have Been Subjected to Female Genital Mutilation/Cutting (FGM/C)	Akhavan	2020	Sweden	journal article
	6	10		The Acton Model: support for women with female genital mutilation.	Albert	2020	UK	journal article
		11	Recommendations for Health Visitors & School Nurses	Female Genital Mutilation: A practical guide for health visitors and school nurses.	Allen	2015	UK	journal article
		12	Recommendation for hcps	Compassionate and Proactive Interventions by Health Workers in the United Kingdom: A Better Approach to Prevent and Respond to Female Genital Mutilation?.	Amasanti	2016	UK	journal article
		13	Systematic review	Clitoral reconstructive surgery after female genital mutilation: A systematic review	Auricchio	2021		journal article
		14	Women's views of general primary care	Women who have undergone female genital mutilation/cutting's perceptions and experiences with healthcare providers in Paris.	Azadi	2022	France	journal article
		15	Hcp views	Postoperative pain after clitoral reconstruction in women with female genital mutilation: An evaluation of practices	Bah	2021	Several countries	journal article
		16	Scoping review	Addressing female genital mutilation in Europe: a scoping review of approaches to participation, prevention, protection, and provision of services.	Baillot	2018	Scottish	journal article
		17	Systematic review	Interventions for improving outcomes for pregnant women who have experienced genital cutting	Balogun			journal article
		18	Recommendation for maternity care	Facilitating birth for women who have experienced genital cutting	Barnawi	2016	Canada	journal article
		19	Recommendations for GPs	Female genital mutilation and modification: Providing sensitive and appropriate care	Bateson	2013	Australia	journal article
	7	20		FGM (Female Genital Mutilation): Between clinical aspects and human rights	Beltran	2015	France	journal article
		21	Scoping review	Attitudes and Experiences Surrounding Female Genital Mutilation/Cutting in the United States: A Scoping Review	Besera	2022	USA	journal article
		22	Hcp's views of general maternity care	Some women are proud of their experience and I have to respect that': an interview-study about midwives' experiences in caring for infibulated women during childbirth in Sweden.	Boisen	2021	Australia	journal article
		23	Not high income country	Female Genital Mutilation and Cutting and Obstetric Outcomes	Bonavina	2022	Sudan	journal article
		24	Narrative review	Psychosexual Consequences of Female Genital Mutilation and the Impact of Reconstructive Surgery: A Narrative Review	Buggio	2019		journal article
		25	Conference abstract	A Belgian multi-disciplinary Female Genital Mutilation medical reference center: a descriptive report of three years of practice	Caillet	2017	Belgium	journal article
		26	No further information	Female genital mutilation reconstruction: A preliminary report	chang	2017	USA	journal article
		27	Scoping review	Surgical management of female genital mutilation-related morbidity: A scoping review	chappell	2021	USA	journal article
	8	28		Clinical and Patient-Reported Outcomes of 19 Patients Undergoing Clitoral and Labial Reconstruction After Female Genital Mutilation/Cutting	christopher	2022	USA	journal article
		29	Wrong design (Interview w Foldes)	[Excision: the journey of reconstruction].	Clavagnier	2020	France	journal article
		30	Community views of FGM	Pilot study: Attitudes towards and knowledge about female genital mutilation or cutting (FGM/C) at London specialist FGM/C clinics	Cohen	2017	Scottish	journal article
		31	Community views of FGM	Missing from the debate? A qualitative study exploring the role of communities within interventions to address female genital mutilation in Europe.	Connelly		UK	journal article
		32	Women's views (Somali) of sexual health in USA	Sexual Health Care, Sexual Behaviors and Functioning, and Female Genital Cutting: Perspectives From Somali Women Living in the United States.	Connor	2015	USA	journal article
		33	General care	Female genital mutilation management in the ambulatory clinic setting: a case study and review of the literature.	Craven	2016	USA	journal article
		34	General maternity care - NOT a specialist service	Female genital mutilation: Obstetric outcomes in metropolitan Sydney.	Davis	2019	Australia	journal article
		35	Conference abstract	Co-design to inform shared decision-making tools for pregnant women with FGM in primary care	Dawson	2020	Australia	oral presentation
		36	Systematic review	A systematic review of doctors' experiences and needs to support the care of women with female genital mutilation	Dawson	2015	Australia	journal article
		37	Hcp's views of general maternity care	Midwives' experiences of caring for women with female genital mutilation: Insights and ways forward for practice in Australia.	Dawson	2015	Australia
		38	Scoping review	Woman and girl-centred care for those affected by female genital mutilation: a scoping review of provider tools and guidelines.	Dawson	2022		journal article
		39	Literature review o training of Midwives	Evidence to inform education, training and supportive work environments for midwives involved in the care of women with female genital mutilation: a review of global experience.	Dawson	2015		journal article
		40	Literature review of counselling for women who've had CR	A multidisciplinary approach to clitoral reconstruction after female genital mutilation: the crucial role of counselling	De Schrijver	2016	Belgium	opinion paper
		41	General maternity care	Intervention of the hospital midwife in the case of a pregnant women who had undergone female genital mutilation. A case study.	Dias-Jimenez	2017	Spain
		42	Not found	A WOMEN'S HEALTH ISSUE: FEMALE GENITAL MUTILATION (FGM) IN AUSTRALIA.	Diaz		Australia
		43	General care	An overview of female genital mutilation	Dilbaz	2019	Turkey	journal article
		44	Conference abstract	Study protocol: A critical communicative evaluation of maternal care pathways for fgm in lothian	Di Rosa	2019	Scotland	conference abstract
		45	hcp's veiws	Supporting patients with female genital mutilation in primary care: a qualitative study exploring the perspectives of GPs' working in England.	Dixon	2020	UK	journal article
		46	Conference abstract	Meeting the sexual health needs of women with female genital mutilation: An integrated model of care	Dominguez Garcia	2013	UK	oral presentation
		47	Conference abstract/poster	Female genital mutilation (FGM)-providing a holistic approach and challenging taboos in a sexual health setting	Dominguez	2012	UK	poster
	9	48		Sexological care of circumcised women: Experience in Nantes, France. Preliminary study	Dugast	2017	France	journal article
		49	Literature review on education/training of hcps	Female Genital Mutilation: Treatment Updates and the Need for Education.	Easwaran	2022	USA	journal article
		50	Scoping review	A scoping review of FGM in humanitarian settings: an overlooked phenomenon with lifelong consequences	Elnakib	2022	USA	journal article
		51	Conference abstract	Is research data used in education for health professionals on management of Female Genital Cutting?: results from Sweden	Essen	2017		journal article
		52	Systematic review	Crossing cultural divides: A qualitative systematic review of factors influencing the provision of healthcare related to female genital mutilation from the perspective of health professionals	Evans	2020	UK	journal article
		53	Conference abstract	Seeking respectful care: A qualitative evidence synthesis of the healthcare experiences of women who have undergone FGM/C	Evans	2020	UK	conference abstrat
		54	Systematic review	Improving care for women and girls who have undergone female genital mutilation/cutting: qualitative systematic reviews	Evans	2019	UK	journal article
		55	DUPLICATE	Improving care for women and girls who have undergone female genital mutilation/cutting: qualitative systematic reviews	Evans	2019	UK	journal article
		56	Study protocol	What are the experiences of seeking, receiving and providing FGM-related healthcare? Perspectives of health professionals and women/girls who have undergone FGM: protocol for a systematic review of qualitative evidence.	Evans	2017	UK	journal article
		57	Systematic review	Seeking culturally safe care: a qualitative systematic review of the healthcare experiences of women and girls who have undergone female genital mutilation/cutting	Evans	2019	UK	journal article
		58	Hcps views of general care in USA	United States' Obstetrician/Gynecologists' Readiness to Care for Women Affected by Female Genital Cutting.	Fay	2022	USA	journal article
	10	59		Reconstructive surgery after female genital mutilation: a prospective cohort study.	Foldes	2012	France	journal article
		60	Women's views of general care in Spain	Female Genital Mutilation Consequences and Healthcare Received among Migrant Women: A Phenomenological Qualitative Study.	Gonzalez-Timoneda		Spain	journal article
		61	Literature review of women's birth experiences	A Meta-Synthesis of the Birth Experiences of African Immigrant Women Affected by Female Genital Cutting.	Hamid	2017	USA	journal article
		62	General healthcare in Swiss hospitals	Diagnoses and procedures of inpatients with female genital mutilation/cutting in Swiss University Hospitals: a cross-sectional study.	Horowicz	2022	Swiss	journal article
		63	Recommendation for FGM care	Tackling female genital mutilation in the UK.	Hussain & Rymer	2017	UK	journal article
		64	Women's and hcps views of FGM care and the law in Canada	How Canadian Law Shapes the Health Care Experiences of Women with Female Genital Mutilation/Cutting/Circumcision and Their Providers: A Disjuncture Between Expectation and Actuality	Jacobson	2022	Canada	journal article
		65	Women's views of general maternity care in Maine, USA	A Mixed-Methods Study of Immigrant Somali Women's Health Literacy and Perinatal Experiences in Maine.	Jacoby		USA	journal article
		66	Conference abstact	Female Genital Mutilation: 5 year retrospective study of obstetric and neonatal outcomes at Sydney metropolitan hospital	Jellins	2017	Australia	journal article
		67	Community views of healthcare	Undoing female genital cutting: perceptions and experiences of infibulation, defibulation and virginity among Somali and Sudanese migrants in Norway.	Johansen	2018	Norway	journal article
		68	Community views of healthcare	Resistance to Infibulation and Resistance to Defibulation Coexist Change of Practice but Continuation of Values in Norway	Johansen			journal article
		69	Not high income country only	Health sector involvement in the management of female genital mutilation/cutting in 30 countries	Johansen	2018		journal article
		70	Community views of healthcare	Virility, pleasure and female genital mutilation/cutting. A qualitative study of perceptions and experiences of medicalized defibulation among Somali and Sudanese migrants in Norway.	Johansen	2017	Norway	journal article
		71	Community views of general healthcare	Influence of Female Genital Mutilation/Cutting on Health Morbidity, Health Service Utilization and Satisfaction with Care among Somali Women and Teenage Girls in the United States.	Johnson‑Agbakwu	2022	USA	journal article
		72	Conference abstract	Meeting the physical and psychological needs of women affected by female genital mutilation/cutting in a nurse/midwife led women's health clinic	Jones	2019	Australia	?conference abstract
		73	DUPLICATE		Jones, Marie
		74	Not found	Motives, expectations and experiences of clitoral reconstruction after female genital cutting	Jordal	2018
	11	75		The benefits and disappointments following clitoral reconstruction after female genital cutting: A qualitative interview study from Sweden.	Jordal	2021	Sweden	journal article
		76	Literature review	Challenges in providing quality care for women with female genital cutting in Sweden - A literature review.	Jordal	2018		journal article
		77	Commentary	Clitoral reconstruction: Understanding changing gendered health care needs in a globalized Europe	Jordal	2018		commentary/review of situation
	12	78		Outcomes of clitoral reconstruction in women that experienced genital mutilation and/or genital cutting: 10 years of experience in the Netherlands	Karim	2022	Netherlands	journal article
		79	General primary/GP care	Female genital mutilation and women's healthcare experiences with general practitioners in the Netherlands: A qualitative study.	Kawous	2020	Netherlands
		80	Conference abstract	Promoting sexual health in women with FGM/C: The underlying ethics of care	Koukoui	2020	Canada	conference abstract
		81	Conference abstract	When conflicting ideologies on body and sexuality are at stake: Sexual-health counselling targeting young women with FGC in Sweden	Larsson			conference abstract
		82	Conference abstract	Evaluation of female genital mutilation in a sexual health clinic	Leighton			conference abstract
		83	Not found	Multidisciplinary care for women affected by female genital mutilation/cutting Findings from Belgium	Leyes	2016		book chapter
		84	General care	Health workers and Sub Saharan African women's understanding of equal access to healthcare in Norway.	Lien	2021	Norway	journal article
		85	Hcps views	A system analysis of the mental health services in Norway and its availability to women with female genital mutilation.	Lien	2020	Norway	journal article
		86	Not found	Genital mutilation and clitoris reconstruction	Lopez- Olmos	2016	Spain	journal article
		87	Conference abstract	Accessible integrated care to meet the complex needs of women with female genital mutilation (FGM)	Low Beer	2013	UK	?
		88	Outside of date	Experiences from pregnancy and childbirth related to female genital mutilation among Eritrean immigrant women in Sweden	Lundberg	2008	Sweden	journal article
		89	Commentary	NHS opens eight walk-in FGM clinics across England.	Mahase	2019	UK	BMJ comment
	13	90		Clitoral Reconstruction Using a Vaginal Graft After Female Genital Mutilation.	Manero	2018	spain	journal article
		91	Hcp views in USA	Factors Associated with Health Care Provider Attitudes, and Confidence for the Care of Women and Girls Affected by Female Genital Mutilation/Cutting.	Marea	2021	usa	journal article
		92	Womens views of accesssing general maternity care	Health care-seeking patterns for female genital mutilation/cutting among young Somalis in Norway.	Mbanya	2018	Norway	journal article
		93	Womens views of accessing general maternity care	Barriers to access to the Norwegian healthcare system among sub-Saharan African immigrant women exposed to female genital cutting.	Mbanya	2020	NOrway	journal article
		94	Outside of date		McCleary PH	1995	Canada	journal article
		95	Recommendatons	The role of community nurses in preventing female genital mutilation.	McCrae	2015	UK	journal article
	14	96		Changes in Sexual Distress, Depression and Sexual Function after Clitoral Reconstruction in Women with Female Genital Mutilation/Cutting	Mestre-Bach	2018	Spain	journal article
		97	Women's views of general healthcare in USA	Female Genital Mutilation/Cutting among Somali Women in the U.S. State of Arizona: Evidence of Treatment Access, Health Service Use and Care Experiences.	Michlig	2021	USA	journal article
		98	General maternity care - 2 cases of deinfibulation in UK	Pregnancy with a pinhole introitus: A report of two cases and a review of the literature	Mistry	2015	UK, Sheffield	journal article
		99	Recommendations	FGM and midwifery practice	Mitchell	2016	UK	journal article
		100	Not found	Vulvar reconstruction following female genital mutilation/cutting (FGM/C) and other acquired deformities	O' Dey	2017	Germany	journal article
		101	Women's views of general maternity care in uK	A qualitative study exploring how Somali women exposed to female genital mutilation experience and perceive antenatal and intrapartum care in England.	Moxey	2016	England	journal article
		102	Wrong design - views of health care administrators	Patient-Centered and Culturally Appropriate Reproductive Health Care for Women From Somalia	Narruhn	2918	USA	journal article
		103	Not found	Female genital mutilation - Effects on health	Neises	2017	Germany
		104	Literature review	Commentary: What should referral pathways have to improve healthcare experiences of women with female genital mutilation in Australia?.	Njue	2021	Australia	journal article
		105	Women's views of general FGM	Challenges in combatting female genital mutilation: narratives of black Sub-Saharan African (BSSA) women in the English west Midlands region.	Nyashanu	2021	UK	journal article
		106	Hcps/Midwives views of FGM obstetric care in Australia	Australian midwives' perspectives on managing obstetric care of women living with female genital circumcision/mutilation.	Ogunsiji,	2016	Australia	journal article
	15	107		Pleasure, womanhood and the desire for reconstructive surgery after female genital cutting in Belgium.	O'Neill,	2022	Belgium	journal article
		108	Women's views of general maternity care	The experience of NHS care for women living with female genital mutilation.	Ormorod	2019	UK	journal article
		109	Not high income	A hybrid, effectiveness-implementation research study protocol targeting antenatal care providers to provide female genital mutilation prevention and care services in Guinea, Kenya and Somali	Ahmed	2019	Guinea, Kenya & Somalia	journal article
	16	110		Management of type III female genital mutilation in Birmingham, UK: a retrospective audit.	Paliwal	2014	UK	journal article
	17	111		Clinical features associated with female genital mutilation/cutting: A pilot longitudinal study	Paslakis	2020	Spain	journal article
		112	Women's views of general maternity care in Spain	Living with mutilation: A qualitative study on the consequences of female genital mutilation in women's health and the healthcare system in Spain.	Pastor-Bravo	2018	Spain	journal article
		113	Conference poster	Caring for women with female genital mutilation: A case study documenting deinfibulation and post-operative care	Pather K.; Rane A.	2021	Australia & New Zealand conference	poster
		114	Guideline	Directive clinique No 395 - Excision genitale feminine	Perron	2020	Canada	guideline
		115	DUPLICATE	Directive clinique No 395 - Excision genitale feminine	Perron	2020	Canada	guideline
		116	Comment	Female genital cutting	Perron	2013	canada	guideline
		117	Not Found	Female genital mutilation and obstetric intervention	Primrose	2013	UK
		118	Recommendations	Female genital mutilation: Managing the complications, your safeguarding duties and the Law.	Raymond	2016	UK	comment
	18	119		Reconstructive surgery after Female Genital Mutilation: a multidisciplinary approach.	Restaino	2022	italy	journal article
		120	Women's views after deinfibualtion, in UK	A qualitative study of women's lived experience after deinfibulation in the UK.	Safari	2013	UK	journal article
		121	Not found	Female genital cutting (FGC) in the empower clinic in New York City	Saleh	2017	USA	journal article
		122	Literature review	The experience of maternity care for migrant women living with female genital mutilation: A qualitative synthesis.	Scamell	2019	UK	journal article
		123	Conference abstract	14. Qualitative review of experiences and preferences of Somali women affected by FGC	Sharif-Mohamed	2020	USA
		124	Comment	Clitoral Reconstruction After Female Genital Mutilation/Cutting: A Review of Surgical Techniques and Ethical Debate	Sharif Mohamed, F.; Wild, V.; Earp, B.D.; Johnson-Agbakwu, C.; Abdulcadir, J.	2020		ethical commentary
	19	125	womens views of general maternity care	Maternity care of women affected by female genital mutilation/cutting: An audit of two Australian hospitals.	Shukralla	2019	Australia	journal article
		126	Conference abstract	Reconstructive surgery after female genital mutilation	Sigurjonsson	2015	?	conference abstract
		127	Not found	Retrospective data collection research and audit of services at a clinic for survivors of Female Genital Mutilation (FGM) in East London, England	Subramanian	2018	UK	journal article
		128	Not high income	Clitoral inclusion cysts and vulvar reconstruction: Lessons from Sudan	Tayebaly	2018	Sudan	journal article
		129	Conference abstract	Treatment Needs, Experiences and Sexual Quality of Life (SQL) for Women who have Undergone Female Genital Mutilation/Cutting (FGM/C) in Australia: A Pilot Study	Tekanyo	2019	Australia	conference abstract
		130	Recommendations	Nursing Care of Women Who Have Undergone Genital Cutting	Tilley, D.S	2015	USA	generi care recommendations
		131	No further information - from HUG clinic	Autologous Platelet-Rich Plasma in Clitoral Reconstructive Surgery After Female Genital Mutilation/Cutting: A Pilot Case Study.	Tognazzo	2022	Switzerland	journal article
		132	Systematic review	Maternity care experiences and health needs of migrant women from female genital mutilation-practicing countries in high-income contexts: A systematic review and meta-synthesis.	Turkmani	2018	Australia
		133	Women's views of general maternity care in Australia	Understanding the Experiences and Needs of Migrant Women Affected by Female Genital Mutilation Using Maternity Services in Australia.	Turkmani	2020	Austtralia
	20	134		Obstetric outcomes for women with female genital mutilation at an Australian hospital, 2006-2012: a descriptive study.	Varol	2016	Australia
		135	Recommendations	Evidence-based policy responses to strengthen health, community and legislative systems that care for women in Australia with female genital mutilation / cutting.	Varol	2017	Australia	Policy reform suggestions/recommendations
		136	Community views of healthcare in North Yarra, Australia	Listening to North Yarra communities about female genital cutting	Vaughan	2015	Australia
		137	Conference absstract	Experiences with clitoris repair with counselling or counselling only in france, for effect on sexual satisfaction for women with fgm	Villani	2012	France
		138	Women's views of their sexual health needs in Switzerland	In their own words: The health and sexuality of immigrant women with infibulation living in Switzerland	Villani	2016	Switzerland
		139	Recommendations	Reconstructing Sexuality after Excision: The Medical Tools.	Villani	2020	France
	21	140		Using the Female Sexual Function Index (FSFI) to evaluate sexual function in women with genital mutilation undergoing surgical reconstruction: A pilot prospective study	Vital	2016	France
		141	Recommendations	Female genital mutilation: implications for clinical practic	Von Rege	2017	UK	recommendations
		142	Outside of date	A study of Swedish midwives' encounters with infibulated African women in Sweden	Widmark	2002	Sweden
		143	Women's exepreince of general maternity care in USA	Perinatal Experiences of Somali Couples in the United States	Wojnar	2015	USA
		144	Systematic review	The experiences and psychological outcomes for pregnant women who have had FGM: A systematic review	Wood	2021	UK
		145	Wrong design - Paediatric care	Diagnosis, Management, and Treatment of Female Genital Mutilation or Cutting in Girls.	Young	2020	USA	recommendations
	22	146		Quality of obstetric and midwifery care for pregnant women who have undergone female genital mutilation.	Zenner	2013	UK
	23	147		Barriers and facilitators to the access to specialized female genital cutting healthcare services: Experiences of Somali and Sudanese women in Norway.	Ziyada	2021	Norway
		148	Women's experience of specialist healthcare services	Sexual norms and the intention to use healthcare services related to female genital cutting: A qualitative study among Somali and Sudanese women in Norway.	Ziyada	2020	Norway
		149	Systematic review	Female genital mutilation and cutting: a systematic literature review of health professionals' knowledge, attitudes and clinical practice.	Zurynski	2015	Australia
	24	150		Antenatal Care Equity and Social Equality for women with Female Genital Mutilation in Scotland: A Multi-stakeholder view	Di Rosa	2023	UK
	25	151		Addressing FGM with Multidisciplinary Care. The Experience of the Belgian Reference Center CeMAViE	Caillet	2018	Belgium
		152	Wrong design - economic analysis	Economic Analysis of NHS FGM Support Clinics	YHEC	2021	UK
		154	Community views	Preferences for deinfibulation (opening) surgery and female genital mutilation service provision: A qualitative study	Jones L	2022	UK
